# Supplementary material for: BcWRKY22 Activates BcCAT2 to Enhance Catalase (CAT) Activity and Reduce Hydrogen Peroxide (H2O2) Accumulation, Promoting Thermotolerance in Non-Heading Chinese Cabbage (Brassica campestris ssp. chinensis)
Source: MDPI journal article supplement (doi:10.3390/antiox12091710), 2023-09-01
Supplement: s1 [file s1]

**Table S2. Analysis of the *BcCAT2* promoter elements by PlantCare.**

| name        | sequence       | function                                                             |
|-------------|----------------|----------------------------------------------------------------------|
| TGACG-motif | TGACG          | cis-acting regulatory element involved in the MeJA-responsiveness    |
| Unnamed__1  | CGTGG          |                                                                      |
| chs-CMA1a   | TTACTTAA       | part of a light responsive element                                   |
| Unnamed__4  | CTCC           |                                                                      |
| MYB         | TAACCA         |                                                                      |
| MYB         | TAACCA         |                                                                      |
| MYB         | TAACCA         |                                                                      |
|             | motif_sequence | short_function                                                       |
| GATA-motif  | AAGGATAAGG     | part of a light responsive element                                   |
| TCT-motif   | TCTTAC         | part of a light responsive element                                   |
| O2-site     | GATGATGTGG     | cis-acting regulatory element involved in zein metabolism regulation |
| WRE3        | CCACCT         |                                                                      |

|                 |            |                                                                  |
|-----------------|------------|------------------------------------------------------------------|
| ERE             | ATTTTAAA   |                                                                  |
| AAGAA-motif     | GAAAGAA    |                                                                  |
| as-1            | TGACG      |                                                                  |
| MYC             | CATTG      |                                                                  |
| MYC             | CAATTG     |                                                                  |
| MYC             | CAATTG     |                                                                  |
| TATA-box        | ATATAA     | core promoter element around -30 of transcription start          |
| TATA-box        | TATA       | core promoter element around -30 of transcription start          |
| TATA-box        | ATATAT     | core promoter element around -30 of transcription start          |
| TATA-box        | TATA       | core promoter element around -30 of transcription start          |
| TATA-box        | TACAAAA    | core promoter element around -30 of transcription start          |
| TATA-box        | TATAAAT    | core promoter element around -30 of transcription start          |
| TATA-box        | TATAAA     | core promoter element around -30 of transcription start          |
| TATA-box        | TATAA      | core promoter element around -30 of transcription start          |
| TATA-box        | TATA       | core promoter element around -30 of transcription start          |
| Myb             | CAACTG     |                                                                  |
| Myb             | CAACTG     |                                                                  |
| Myb             | TAACTG     |                                                                  |
| Myb             | CAACTG     |                                                                  |
| W box           | TTGACC     |                                                                  |
| TC-rich repeats | GTTTCCTTAC | cis-acting element involved in defense and stress responsiveness |
| CAAT-box        | CCAAT      | common cis-acting element in promoter and enhancer regions       |
| CAAT-box        | CAAT       |                                                                  |
| CAAT-box        | CAAT       |                                                                  |
| CAAT-box        | CAAAT      | common cis-acting element in promoter and enhancer regions       |
| CAAT-box        | CAAT       |                                                                  |
| CAAT-box        | CAAAT      | common cis-acting element in promoter and enhancer regions       |
| CAAT-box        | CAAT       |                                                                  |
| CAAT-box        | CCAAT      | common cis-acting element in promoter and enhancer regions       |
| CAAT-box        | CAAT       |                                                                  |
| CAAT-box        | CAAAT      | common cis-acting element in promoter and enhancer regions       |

|                   |            |                                                                   |
|-------------------|------------|-------------------------------------------------------------------|
| CAAT-box          | CCAAT      | common cis-acting element in promoter and enhancer regions        |
| CAAT-box          | CAAAT      | common cis-acting element in promoter and enhancer regions        |
| MYB-like sequence | TAACCA     |                                                                   |
| MYB-like sequence | TAACCA     |                                                                   |
| MYB-like sequence | TAACCA     |                                                                   |
| TCA               | TCATCTTCAT |                                                                   |
| DRE1              | ACCGAGA    |                                                                   |
| CGTCA-motif       | CGTCA      | cis-acting regulatory element involved in the MeJA-responsiveness |
| TGA-element       | AACGAC     | auxin-responsive element                                          |
| TGA-element       | AACGAC     | auxin-responsive element                                          |
| STRE              | AGGGG      |                                                                   |
| MBS               | CAACTG     | MYB binding site involved in drought-inducibility                 |
| MBS               | CAACTG     | MYB binding site involved in drought-inducibility                 |
| MBS               | CAACTG     | MYB binding site involved in drought-inducibility                 |
