# Supplementary material for: BcWRKY22 Activates BcCAT2 to Enhance Catalase (CAT) Activity and Reduce Hydrogen Peroxide (H2O2) Accumulation, Promoting Thermotolerance in Non-Heading Chinese Cabbage (Brassica campestris ssp. chinensis)
Source: MDPI journal article supplement (doi:10.3390/antiox12091710), 2023-09-01
Supplement: s1 [file s1]

### Supplementary Table S1. The primers used in this article.

| Name                                        | Sequences(5' to 3')                 |
|---------------------------------------------|-------------------------------------|
| <b>Primers for gene cloning</b>             |                                     |
| <i>BcWRKY22-F</i>                           | ATGGCCGACGATTGGGATCTCCACGC          |
| <i>BcWRKY22-R</i>                           | TCATATTCCACCGCTAGCTGTGGCAGCG        |
| <b>Primers for isolation of promoter</b>    |                                     |
| P-cat-F                                     | CAACCTACATTGTGATTCTCA               |
| P-cat-R                                     | AGTAGAAAGATAGAGAGAGTTTG             |
| <b>Primers for gene qPCR</b>                |                                     |
| GAPC-F                                      | AGAGCCGCTTCCTTCAACATCATT            |
| GAPC-R                                      | TGGGCACACGGAAGGACATACC              |
| <i>BcWRKY22-DL-F</i>                        | CTAAGTCTCCCACGACCACG                |
| <i>BcWRKY22-DL-R</i>                        | CCTCGAAGAAGTCCTCGCTC                |
| DL-CAT-F1                                   | ATCCAGGTCATTGATCCAGC                |
| DL-CAT-R1                                   | ATGATAGCAGGGCAAAAGGC                |
| DL-BcDREB2A-F                               | TGATGTCCATGAGGGTGCAG                |
| DL-BcDREB2A-R                               | TTCTCCTCCAGAAGCCCAGT                |
| DL-BcHSFA2-F                                | GTTGCGCTAATGAGCAAGG                 |
| DL-BcHSFA2-R                                | CGTCTCCATATCATCCTTCATTCT            |
| DL-GolS1-F                                  | GTCGCCTCCAGTTCACGG                  |
| DL-GolS1-R                                  | GGGACGTCTGGTAGTATCGC                |
| <b>Primers for subcellular localization</b> |                                     |
| 101- WRKY22-F                               | TCTTCACTGTTGATACATATGATGGCCGACGATTG |
| 101- WRKY22-R                               | GCCCTTGCTCACCATGGATCCTATTCCACCGCTAG |
| <b>Primers for transient expression</b>     |                                     |
| 101- WRKY22-F                               | TCTTCACTGTTGATACATATGATGGCCGACGATTG |
| 101- WRKY22-R                               | GCCCTTGCTCACCATGGATCCTATTCCACCGCTAG |
| <b>Primers for expression in NHCC roots</b> |                                     |
| 2300- WRKY22-F                              | CGGGGGACTCTGCAGGTCGACATGGCCGACGATTG |
| 2300- WRKY22-R                              | TGAACGATCTCTAGAGTCGACTATTCCACCGCTAG |

|                                                          |                                                                              |
|----------------------------------------------------------|------------------------------------------------------------------------------|
| <b>Primers for dual-luciferase vectors construction</b>  |                                                                              |
| Pgreen -cat-F                                            | CTATAGGGCGAATTGGGTACCCATGAGAGTTTTGTT                                         |
| Pgreen -cat-R                                            | ATCGATACCGTCGACCTCGAGAGTAGAAAGATAGAG                                         |
| <b>Primers for yeast one hybrid vectors construction</b> |                                                                              |
| PjG4-22-F                                                | GATTATGCCTCTCCCGAATTCATGGCCGACGATTG                                          |
| PjG4-22-R                                                | AGAAGTCCAAAGCTTCTCGAGTATTCCACCGCTAGC                                         |
| Plac-CAT-1-f                                             | TGAATTGAAAAGCTTTTAAGGTCAAGATTTTAAGGTCAAGATTT<br>TAAGGTCAAGATTCTCGAGGCATGTGCT |
| Plac-CAT-1-r                                             | AGCACATGCCTCGAGAATCTTGACCTTAAAATCTTGACCTTAAA<br>ATCTTGACCTTAAAAGCTTTTCAATTCA |
| Plac-CAT-2-f                                             | TGAATTGAAAAGCTTAACAAGTCAAACTAACAAGTCAAACTA<br>ACAAGTCAAACTCTCGAGGCATGTGCT    |
| Plac-CAT-2-r                                             | AGCACATGCCTCGAGAGTTTTGACTTGTTAGTTTTGACTTGTTAG<br>TTTTGACTTGTTAAGCTTTTCAATTCA |
| <b>Primers for EMSA</b>                                  |                                                                              |
| MAL-22-F                                                 | GAGGGAAGGATTTTCAAGAATTCATGGCCGACGATTGG                                       |
| MAL-22-R                                                 | CAGGTCGACTCTAGAGGATCCTCATATTCCACCGCTA                                        |
| EMSA-CAT2-F                                              | TATTCGTACAAGTACAACAAGTCAAACTAATAAAATAAAATAGC                                 |
| EMSA-CAT2-R                                              | GCTATTTTATTTTATTAGTTTTGACTTGTTGTACTTGTACGAATA                                |
| EMSA-CAT2-COLD-F                                         | TATTCGTACAAGTACAACAAGTCAAACTAATAAAATAAAATAGC                                 |
| EMSA-CAT2-M-F                                            | TATTCGTACAAGTACAACAAAAAACTAATAAAATAAAATAGC                                   |
| EMSA-CAT2-M-R                                            | GCTATTTTATTTTATTAGTTTTTTTTTTGTTGTACTTGTACGAATA                               |
