# Supplementary material for: BcWRKY22 Activates BcCAT2 to Enhance Catalase (CAT) Activity and Reduce Hydrogen Peroxide (H2O2) Accumulation, Promoting Thermotolerance in Non-Heading Chinese Cabbage (Brassica campestris ssp. chinensis)
Source: MDPI journal article supplement (doi:10.3390/antiox12091710), 2023-09-01
Supplement: s1 [file s1]

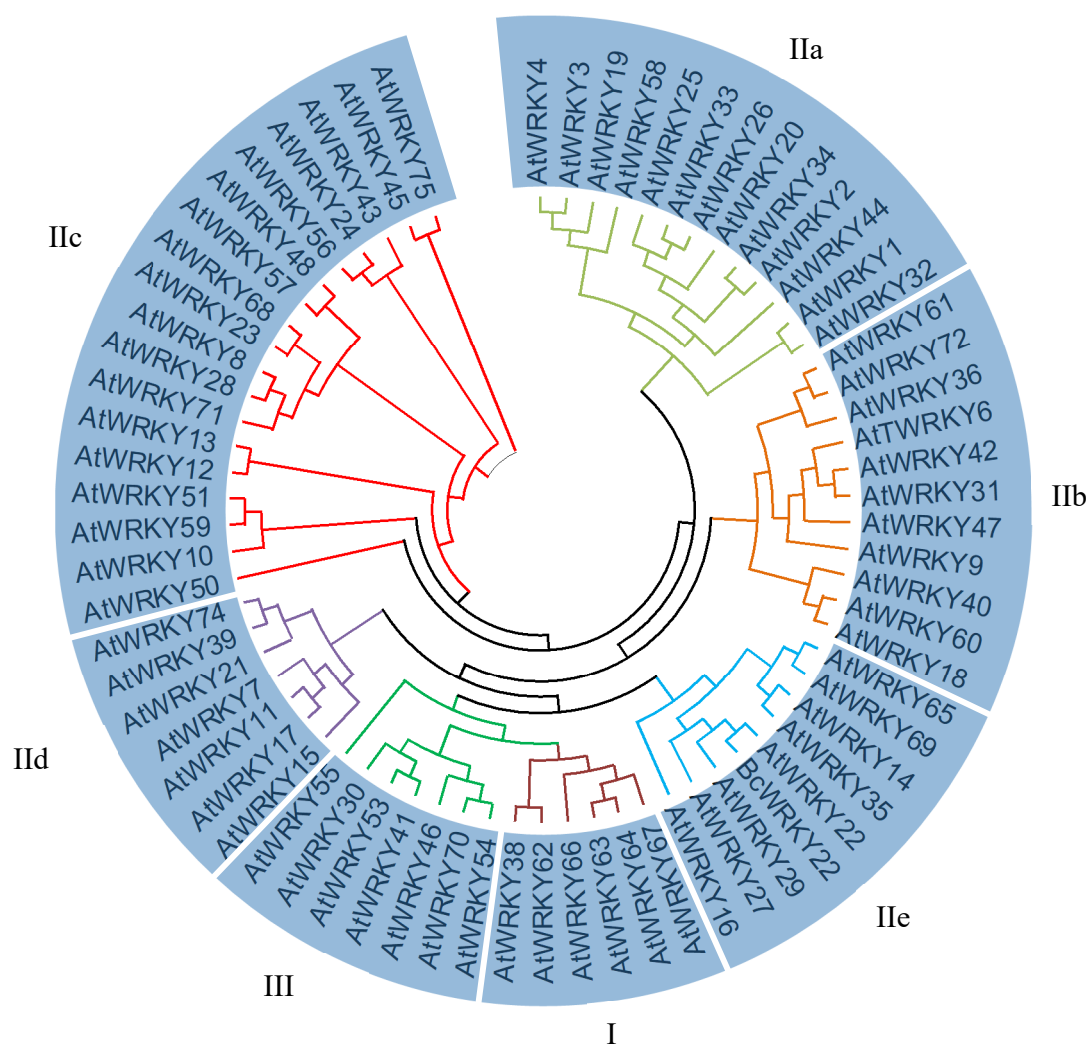

**Figure S1.** A phylogenetic tree constructed based on WRKYs of *Arabidopsis thaliana* and BcWRKY22.

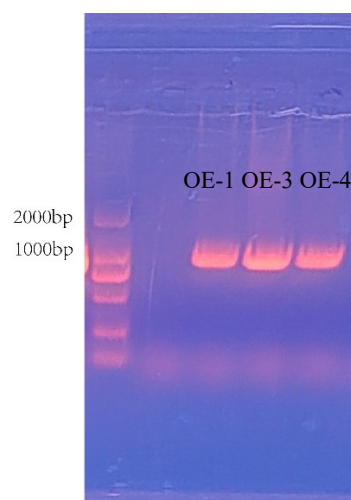

**Figure S2.** Identification of BcWRKY22 overexpressed *Arabidopsis* DNA.
